# Supplementary material for: The threshold-photoelectron spectrum of SiH2: experiment and modeling with MCTDH method
Source: Royal Society of Chemistry journal article supplement (doi:10.1039/d5cp00558b), 2025-01-01
Supplement: d5cp00558b1.pdf [file d5cp00558b1.pdf]

Supporting information for

The threshold-photoelectron spectrum of  $\text{SiH}_2$ :  
experiment and modeling with MCTDH method

L. H. Coudert,<sup>a</sup> N. L. Chen,<sup>a</sup> B. Gans,<sup>a</sup> S. Boyé-Péronne,<sup>a</sup>  
G. A. Garcia,<sup>b</sup> S. Hartweg,<sup>b</sup> and J.-C. Loison<sup>c</sup>

February 25, 2025

<sup>a</sup> Université Paris-Saclay, CNRS, Institut des Sciences Moléculaires d'Orsay, 91405 Orsay, France

<sup>b</sup> Synchrotron SOLEIL, L'Orme des Merisiers, Départementale 128, 91190, Saint-Aubin, France

<sup>c</sup> Institut des Sciences Moléculaires, UMR 5255 CNRS - Université de Bordeaux, Bât. A12, 351 Cours de la Libération, 33405 Talence cedex, France

## S1 Rovibrational Hamiltonian with Radau coordinates

Radau coordinates for an  $XY_2$  molecule are well known<sup>1,2</sup> and consist of the two stretching-type coordinates  $R_1$  and  $R_2$ , and of the bending-type coordinate  $\tilde{\gamma}$ . The corresponding rovibrational Hamiltonian is also well known<sup>1,2</sup> and is given below attaching the  $xyz$  molecular fixed axis system to the molecule so that its origin coincides with the molecular center of mass, the  $xz$  plane containing the three atoms, the  $x$ -axis bisecting the usual bending angle  $\gamma$  and pointing towards the X atom, and the  $z$  axis pointing towards atom  $Y_1$ . Using the Radau bending-type coordinate  $z = \cos \tilde{\gamma}$ , instead of  $\tilde{\gamma}$ , the exact Hamiltonian  $H$  can be expanded as<sup>3</sup>

$$H = H_s + H_b + H_r + V(R_1, R_2, z), \quad (S1)$$

where  $H_s$  and  $H_b$  are kinetic energy operators for the stretching and bending modes, respectively;  $H_r$  is the rotational Hamiltonian; and  $V(R_1, R_2, z)$  is the potential energy function. It can be deduced from the potential energy function expressed with the usual stretching and bending coordinates  $r_1, r_2, \gamma$  using the transformations in Eqs. (2.19)–(2.22) of Johnson and Reinhardt.<sup>1</sup> The stretching kinetic energy operator takes the following form

$$H_s = \frac{P_{R_1}^2}{2m} + \frac{P_{R_2}^2}{2m} \quad (S2)$$

where  $m$  is the mass of the Y atom; and  $P_{R_1}$  and  $P_{R_2}$  are conjugate momenta for  $R_1$  and  $R_2$ , respectively. The bending kinetic energy operator is

$$H_b = \frac{1}{2m} \left( \frac{1}{R_1^2} + \frac{1}{R_2^2} \right) P_z (1 - z^2) P_z, \quad (S3)$$

where  $m$  is defined as for Eq. (S2) and  $P_z$  is the conjugate momentum for  $z$ . The rotational Hamiltonian is written

$$H_r = \frac{1}{2m} \left( \frac{1}{R_1^2} + \frac{1}{R_2^2} \right) \left[ \frac{N_x^2}{2(1-z)} + \frac{N_y^2}{4} + \frac{N_z^2}{2(1+z)} \right] - \frac{1}{4m} \left( \frac{1}{R_1^2} - \frac{1}{R_2^2} \right) \left[ N_y \{ \sqrt{1-z^2}, P_z \} - \frac{\{ N_x, N_z \}}{\sqrt{1-z^2}} \right], \quad (S4)$$

where  $m$  is defined as for Eq. (S2);  $N_x, N_y$ , and  $N_z$  are the components of the rotational angular momentum in the molecular fixed axis system; and  $\{, \}$  is the anticommutator. The volume element to be used for the Hamiltonian in Eq. (S1) is  $dR_1 dR_2 dz \sin \theta d\theta d\phi d\chi$ , where  $\chi, \theta, \phi$  are the usual Eulerian angles parameterizing the orientation of the molecular fixed axis system with respect to the space fixed axis system.

## S2 Applying the MCTDH method

### S2.1 Operators

The MCTDH method<sup>4,5</sup> is used to solve the vibrational problem for the Hamiltonian in Eq. (S1). The MCTDH wavefunction can be obtained from Eq. (19) of Beck *et al.*<sup>4</sup> and takes the following expression in the case of  $f = 3$  degrees of freedom

$$\Psi(Q_1, Q_2, Q_3, t) = \sum_{j_1=1}^{n_1} \sum_{j_2=1}^{n_2} \sum_{j_3=1}^{n_3} A_{j_1 j_2 j_3}(t) \phi_{j_1}^{(1)}(Q_1, t) \phi_{j_2}^{(2)}(Q_2, t) \phi_{j_3}^{(3)}(Q_3, t), \quad (S5)$$

where the nuclear coordinates  $Q_1, Q_2$ , and  $Q_3$  correspond respectively to the Radau bond lengths  $R_1$  and  $R_2$ , and to the Radau bending coordinate  $z$ , the  $A_{j_1 j_2 j_3}$  denote the expansion coefficients;

and  $\phi_{j_\kappa}^{(\kappa)}(Q_\kappa, t)$ , with  $1 \leq \kappa \leq 3$ , are the single-particle functions. The single-particle operators  $h^{(\kappa)}$ , as defined in Eq. (42) of Beck *et al.*,<sup>4</sup> are chosen in the following way:

$$\begin{aligned} h^{(1)} &= \frac{P_{R_1}^2}{2m} + V^{(1)}(R_1), \\ h^{(2)} &= \frac{P_{R_2}^2}{2m} + V^{(2)}(R_2), \\ h^{(3)} &= \frac{1}{mR_e^2} P_z(1 - z^2)P_z + V^{(3)}(z), \end{aligned} \quad (\text{S6})$$

where  $R_e$  is a constant equal to the equilibrium value of either Radau bond length. With the choice indicated by these equations, the residual Hamiltonian  $H_R$ , also defined in Eq. (42) of Beck *et al.*,<sup>4</sup> is written

$$H_R = \sum_{i=1}^2 \frac{1}{2m} \left( \frac{1}{R_i^2} - \frac{1}{R_e^2} \right) P_z(1 - z^2)P_z + \tilde{V}(R_1, R_2, z), \quad (\text{S7})$$

where the first two terms are expressed as products of two single-particle operators and the potential energy term  $\tilde{V}(R_1, R_2, z)$  is  $V(R_1, R_2, z) - V^{(1)}(R_1) - V^{(2)}(R_2) - V^{(3)}(z)$ .

## S2.2 Overall rotation

Taking into account the overall rotation, in agreement with Eqs. (3)–(5) of the paper, requires rewriting the single-particle operators  $h^{(3)}$  in the third of Eqs. (S6) as follows

$$h^{(3)} = \frac{1}{mR_e^2} \left[ P_z(1 - z^2)P_z + \frac{V_+}{2(1+z)} + \frac{V_-}{2(1-z)} + V_0 \right] + V^{(3)}(z), \quad (\text{S8})$$

while the first and second terms of the residual Hamiltonian  $H_R$  in Eq. (S7) should be rewritten

$$\frac{1}{2m} \left( \frac{1}{R_i^2} - \frac{1}{R_e^2} \right) \left[ P_z(1 - z^2)P_z + \frac{V_+}{2(1+z)} + \frac{V_-}{2(1-z)} + V_0 \right], \quad (\text{S9})$$

where  $i = 1$  and  $2$ . In these equations,  $V_+$ ,  $V_-$ , and  $V_0$  are defined in Eqs. (5) of the paper.

## S2.3 Basis set functions

The single-particle functions are expanded in the following way

$$\phi_j^{(\kappa)}(Q_\kappa, t) = \sum_{\alpha=1}^{N_\kappa} c_{j\alpha}^{(\kappa)}(t) \chi_\alpha^{(\kappa)}(Q_\kappa) \quad (\text{S10})$$

where  $1 \leq \kappa \leq 3$ ;  $c_{j\alpha}^{(\kappa)}(t)$  are  $N_\kappa$  time dependent expansion coefficients; and  $\chi_\alpha^{(\kappa)}(Q_\kappa)$  are  $N_\kappa$  basis set functions.

For the two stretching modes, the single-particle functions are expanded using for the  $\chi_\alpha^{(\kappa)}$  functions, with  $\kappa = 1$  and  $2$ , the DVR functions associated with the generalized Gauss-Laguerre quadrature,<sup>6</sup> corresponding to the weight function  $x^\rho \exp(-x)$ , where  $x = \xi R$ . The matrix elements between two DVR functions of the stretching operators  $1/R^2$  and  $P_R^2$ , appearing in Eqs. (S2)–(S4), can be determined from those computed exactly in Gutl  and Coudert<sup>3</sup> with the Sturmian functions<sup>7</sup>

$$u_n^{\rho, \xi}(R) = N_n^{\rho, \xi} x^{\rho/2} \exp(-x/2) L_n^{(\rho)}(x), \quad (\text{S11})$$

where  $n \geq 0$  is an integer;  $N_n^{\rho, \xi}$  is a normalization factor; and  $L_n^{(\rho)}(x)$  is a generalized Laguerre polynomial.<sup>8</sup> These functions are an orthonormal basis set because the generalized Laguerre polynomials are orthogonal with respect to integration over the  $[0, +\infty)$  range with the weight function.

For the bending coordinate, the single-particle function  $\phi_{j_3}^{(3)}(Q_3, t)$  is expanded using for the  $\chi_\alpha^{(3)}$  functions the DVR functions associated with the Gauss-Jacobi quadrature, corresponding to the weight function  $(1-z)^\gamma(1+z)^\delta$ . The matrix elements between two DVR functions of bending operators such as  $1/(1+z)$ ,  $1/(1-z)$ ,  $\{\sqrt{1-z^2}, P_z\}$ , and  $P_z(1-z^2)P_z$ , appearing in Eqs. (S3) and (S4), can be obtained from those computed exactly in Gutlé and Coudert<sup>3</sup> with the following functions<sup>9-11</sup>

$$v_m^{\gamma,\delta}(z) = N_m^{\gamma,\delta}(1-z)^{\gamma/2}(1+z)^{\delta/2}P_m^{(\gamma,\delta)}(z), \quad (\text{S12})$$

where  $m \geq 0$  is an integer;  $N_m^{\gamma,\delta}$  is a normalization factor; and  $P_m^{(\gamma,\delta)}(z)$  is a Jacobi polynomial.<sup>8</sup> These functions are an orthonormal basis set because the Jacobi polynomials are orthogonal with respect to integration over the  $[-1, +1]$  range with the weight function. These functions also are eigenfunctions of the operator

$$P_z(1-z^2)P_z + \frac{1}{2} \left( \frac{\gamma^2}{1-z} + \frac{\delta^2}{1+z} \right), \quad (\text{S13})$$

with eigenvalues  $(m + \delta^+)(m + 1 + \delta^+)$ , where  $\delta^+ = (\gamma + \delta)/2$ .

## S2.4 Symmetry relations

The MCTDH wavefunction in Eq. (S5) involves the expansion coefficients  $A_J$  depending on the compound index  $J = (j_1, j_2, j_3)$  with  $1 \leq j_1 \leq n_1$ ,  $1 \leq j_2 \leq n_2$ , and  $1 \leq j_3 \leq n_3$ . Assuming that the symmetry relations in Eqs. (2) of the paper are fulfilled, the  $n^2 n_3$  compound indexes are mapped onto the  $[1, n^2 n_3]$  integer interval using an integer function  $g(J)$  such that

$$\begin{aligned} 1 \leq g(J) \leq N_s & \quad \text{when } j_1 \leq j_2, \\ N_s + 1 \leq g(J) \leq N_s + N_a & \quad \text{when } j_1 > j_2, \end{aligned} \quad (\text{S14})$$

where  $N_s = n(n+1)n_3/2$  and  $N_a = n(n-1)n_3/2$  are the number of indexes with  $j_1 \leq j_2$  and  $j_1 > j_2$ , respectively. The following  $n^2 n_3 \times n^2 n_3$  unitary matrix  $U_{J',J}$  is introduced and has the following non-vanishing matrix elements

$$U_{J',J} = \begin{cases} \delta_{j'_1,j_1} \delta_{j'_2,j_2} \delta_{j'_3,j_3} & \text{when } j_1 = j_2, \\ (\delta_{j'_1,j_1} \delta_{j'_2,j_2} \delta_{j'_3,j_3} + \delta_{j'_2,j_1} \delta_{j'_1,j_2} \delta_{j'_3,j_3})/\sqrt{2} & \text{when } j_1 < j_2, \\ (\delta_{j'_1,j_1} \delta_{j'_2,j_2} \delta_{j'_3,j_3} - \delta_{j'_2,j_1} \delta_{j'_1,j_2} \delta_{j'_3,j_3})/\sqrt{2} & \text{when } j_1 > j_2. \end{cases} \quad (\text{S15})$$

Using the unitary matrix  $U$ , the matrix  $\mathcal{H}$  of the Hamiltonian  $H$  is transformed as follows

$$\mathcal{H}'_{J,J'} = \sum_{L,L'} (U^{-1})_{J,L} \mathcal{H}_{L,L'} U_{L',J'} = \sum_{L,L'} U_{L,J} \mathcal{H}_{L,L'} U_{L',J'} \quad (\text{S16})$$

The transformed matrix  $\mathcal{H}'_{J,J'}$  is nonzero only if  $1 \leq g(J), g(J') \leq N_s$  and  $N_s + 1 \leq g(J), g(J') \leq N_s + N_a$  because  $H$  is invariant under the interchange of atoms  $Y_1$  and  $Y_2$ . This implies that the  $n^2 n_3 \times n^2 n_3$  matrix  $\mathcal{H}$  is block diagonalized into two blocks. The first  $N_s \times N_s$  block is denoted  $\mathcal{H}^s$ ; the second  $N_a \times N_a$  block is denoted  $\mathcal{H}^a$ . These results are also valid for the residual Hamiltonian  $H_R$  in Eq. (42) of Beck *al.*<sup>4</sup>

The unitary matrix  $U$  can also be used to transform the expansion coefficients  $A_J$ . In the case of the upper (lower) sign for the third of Eqs. (2) of the paper, evaluating  $\sum_L (U^{-1})_{J,L} A_L$  yields an expansion vector  $A^s$  ( $A^a$ ) with only  $N_s$  ( $N_a$ ) nonvanishing components. Since the unitary matrix is time independent, Eqs. (40) and (43) of Beck *al.*<sup>4</sup> should be replaced by the two equations

$$i\dot{A}_J^s = \sum_L \mathcal{H}_{J,L}^s A_L^s \quad \text{and} \quad i\dot{A}_J^a = \sum_L \mathcal{H}_{J,L}^a A_L^a \quad (\text{S17})$$

involving smaller matrices and vectors. When computing eigenvalues and eigenvectors by energy relaxation,<sup>12</sup> the matrix to be diagonalized in Eq. (80) of this reference should be replaced by either  $\mathcal{H}^s$  or  $\mathcal{H}^a$  which allows us to assign the appropriate symmetry label to the energy levels.

Using the third of Eqs. (2) of the paper, it can be shown that the projectors, the mean-fields operators, and the density matrices defined respectively in Eqs. (24), (26), and (27) of Beck *al.*<sup>4</sup> fulfill the following relations

$$P^{(1)} = P^{(2)}, \quad \langle \mathbf{H} \rangle^{(1)} = \langle \mathbf{H} \rangle^{(2)}, \quad \text{and} \quad \boldsymbol{\rho}^{(1)} = \boldsymbol{\rho}^{(2)} \quad (\text{S18})$$

These relations imply that the equations of motions for  $\phi^{(1)}$  and  $\phi^{(2)}$  are identical which is consistent with the second of Eqs. (2) of the paper.

### S3 RT Hamiltonian

For a doubly degenerate  $\Lambda$  electronic state split into two electronic states, denoted  $a$  and  $b$ , by the RT coupling, the Hamiltonian in the adiabatic representation can be expressed as a  $2 \times 2$  matrix written using as basis set functions the electronic wavefunctions  $|a\rangle$  and  $|b\rangle$ . In agreement with Eqs. (12), (13) and (33) of Jungen and Merer<sup>13</sup> and Eq. (5) of Zhang *et al.*,<sup>14</sup> this matrix is the following:

$$H = \begin{pmatrix} H_a & 0 \\ 0 & H_b \end{pmatrix} + \begin{pmatrix} H_{aa} & H_{ab} \\ H_{ba} & H_{bb} \end{pmatrix} \quad (\text{S19})$$

where  $H_a$  and  $H_b$  are the vibrational Hamiltonian for the  $a$  and  $b$  electronic states, respectively, to be obtained from Eq. (S1) where the potential energy function  $V(R_1, R_2, z)$  should be replaced by either  $V_a(R_1, R_2, z)$  or  $V_b(R_1, R_2, z)$  as appropriate; and  $H_{aa}$ ,  $H_{bb}$ ,  $H_{ab}$ , and  $H_{ba}$  are four vibrational operators. They are given by

$$H_{aa} = H_{bb} = \frac{\Lambda^2}{2m} \left( \frac{1}{R_1^2} + \frac{1}{R_2^2} \right) \frac{1}{2(1+z)} \quad (\text{S20})$$

and

$$H_{ab} = H_{ba} = \frac{-K\Lambda}{m} \left( \frac{1}{R_1^2} + \frac{1}{R_2^2} \right) \frac{1}{2(1+z)} + A^{\text{SO}}\Sigma\Lambda. \quad (\text{S21})$$

In Eqs. (S20) and (S21),  $\Lambda$  and  $\Lambda^2$  are the matrix elements  $\langle a|L_z|b\rangle$  and  $\langle a|L_z^2|a\rangle$ , respectively, where  $L_z$  is the component of the electronic angular momentum along the molecule fixed  $z$  axis. In Eq. (S21),  $K$  is the rotational quantum number introduced in Eq. (3) of the paper;  $A^{\text{SO}}$  is the spin-orbit coupling constant; and  $\Sigma$  is the quantum number corresponding to  $S_z$  the component of the spin operator along the molecule fixed  $z$  axis. In the case of the  $\tilde{X}^+ {}^2A_1$  and  $\tilde{A}^+ {}^2B_1$  electronic states of the cation,  $A^{\text{SO}}$  is  $140 \text{ cm}^{-1}$  and  $\Sigma = \pm 1/2$ . The RT wavefunction is written:

$$\Psi(t) = \Psi_a(R_1, R_2, z, t)|a\rangle + \Psi_b(R_1, R_2, z, t)|b\rangle \quad (\text{S22})$$

where  $\Psi_a(R_1, R_2, z, t)$  and  $\Psi_b(R_1, R_2, z, t)$  are two time dependent vibrational wavefunctions.

When computing the TPE spectrum of the  $\Lambda \leftarrow X$  ionization transition, the vibrational function of the  $X$  electronic state  $\phi(R_1, R_2, z)$  should be time propagated using the rovibronic Hamiltonian in Eq. (S19). The auto-correlation function  $c(t)$  should be evaluated taking the initial condition  $\Psi_a(R_1, R_2, z, t=0) = \phi(R_1, R_2, z)/\sqrt{2}$  and  $\Psi_b(R_1, R_2, z, t=0) = \phi(R_1, R_2, z)/\sqrt{2}$ . Fourier transforming the auto-correlation function yields the TPS spectra of both the  $a \leftarrow X$  and  $b \leftarrow X$  ionizing transitions.

### S4 Weights used in the TPES modeling

The weights  $W_{K,v}$  of a neutral energy level, labeled with the rotational quantum number  $K$  and the shorthand vibrational label  $v$ , introduced in Section 4, is evaluated taking a rotational temperature

$T_{\text{rot}}$  and a vibrational temperature  $T_{\text{vib}}$ . We have

$$W_{K,v} = g_{K,v} \exp -[(E_{K,v=0} - E_{0,0})/(kT_{\text{rot}}) + (E_{K=0,v} - E_{0,0})/(kT_{\text{vib}})], \quad (\text{S23})$$

where  $E_{0,0}$  is the energy  $E_{K=0,v=0}$  of the  $K = v = 0$  ground level of the neutral and the statistical weight  $g_{K,v}$  is

$$g_{K,v} = \sum_{J \geq K} (2J + 1) e^{-[J(J+1)\bar{B}]} \quad (\text{S24})$$

where  $\bar{B} = (B + C)/2 = 5.3633255 \text{ cm}^{-1}$  is defined in terms of the rotational constants  $B$  and  $C$  of the neutral.

## References

- [1] B. R. Johnson and W. P. Reinhardt, *J. Chem. Phys.*, 1986, **85**, 4538–4556.
- [2] B. T. Sutcliffe and J. Tennyson, *Int. J. Quant. Chem.*, 1991, **39**, 183–196.
- [3] C. Gutlé and L. H. Coudert, *J. Mol. Spectrosc.*, 2012, **273**, 44–49.
- [4] M. H. Beck, A. Jäckle, G. A. Worth and H.-D. Meyer, *Phys. Rep.*, 2000, **324**, 1–105.
- [5] H.-D. Meyer, F. Gatti and G. A. Worth, *Multidimensional Quantum Dynamics: MCTDH Theory and Applications*, Wiley-VCH, Weinheim, 2009.
- [6] H. Partridge and D. W. Schwenke, *J. Chem. Phys.*, 1997, **106**, 4618–4639.
- [7] K. Nakagawa and H. Uehara, *Chem. Phys. Lett.*, 1990, **168**, 96–100.
- [8] M. Abramovitz and I. A. Stegun, *Handbook of Mathematical Functions*, Dover, New York, 1968.
- [9] L. H. Coudert, *J. Mol. Spectrosc.*, 1992, **154**, 427–442.
- [10] L. H. Coudert, *J. Mol. Spectrosc.*, 1994, **165**, 406–425.
- [11] L. H. Coudert, *J. Mol. Spectrosc.*, 1997, **181**, 246–273.
- [12] H.-D. Meyer and G. A. Worth, *Theor. Chem. Acc.*, 2003, **109**, 251–267.
- [13] C. Jungen and A. Merer, *Mol. Phys.*, 1980, **40**, 1–23.
- [14] Z. Zhang, H. Ma and W. Bian, *J. Chem. Phys.*, 2011, **135**, 154303.
- [15] P. Jensen and P. R. Bunker, *J. Chem. Phys.*, 1988, **89**, 1327–1332.
- [16] J.-P. Gu, G. Hirsch, R. J. Buenker, M. Brumm, G. Osmann, P. R. Bunker and P. Jensen, *J. Mol. Struct.*, 2000, **517–518**, 247–264.
- [17] V. H. J. Clark, A. Owens, J. Tennyson and S. N. Yurchenko, *J. Quant. Spectrosc. Radiat. Transfer*, 2020, **246**, 106929.

Table S3: Potential energy parameters for the neutral triplet  $\bar{a}^3B_1$  electronic state

| Param. <sup>a</sup> | Value <sup>b</sup> | Param. <sup>a</sup> | Value <sup>b</sup> |
|---------------------|--------------------|---------------------|--------------------|
| $r_{12}^e$          | 1.464 12(54)       | $f_1^{(5)}$         | 11 498.9(6434)     |
| $a_1$               | 1.40 <sup>c</sup>  | $f_{11}^{(1)}$      | 3861.8(25356)      |
| $f_0^{(0)}$         | -63 672 129.3(89)  | $f_{11}^{(2)}$      | 12 182.9(58050)    |
| $f_{11}^{(0)}$      | 38 633.9(4713)     | $f_{11}^{(3)}$      | 12 752.4(58127)    |
| $f_{13}^{(0)}$      | -1727.4(4608)      | $f_{11}^{(4)}$      | 3279.6(19585)      |
| $f_{111}^{(0)}$     | -6386.1(18515)     | $f_{13}^{(1)}$      | -819.5(28519)      |
| $f_{113}^{(0)}$     | -4395.8(14057)     | $f_{13}^{(2)}$      | 4590.4(69633)      |
| $f_{1111}^{(0)}$    | -3259.3(90122)     | $f_{13}^{(3)}$      | 6311.6(70929)      |
| $f_{1113}^{(0)}$    | -6732.7(64927)     | $f_{13}^{(4)}$      | 3353.4(23973)      |
| $f_{1133}^{(0)}$    | -7100.7(84502)     | $f_{111}^{(1)}$     | -8481.0(99873)     |
| $f_0^{(1)}$         | 59 251.9(1736)     | $f_{111}^{(2)}$     | -6821.8(147198)    |
| $f_0^{(2)}$         | 210 204.0(14475)   | $f_{111}^{(3)}$     | -510.1(65016)      |
| $f_0^{(3)}$         | 476 592.1(54063)   | $f_{113}^{(1)}$     | -12 352.9(78115)   |
| $f_0^{(4)}$         | 668 490.1(100682)  | $f_{113}^{(2)}$     | -13 183.3(117352)  |
| $f_0^{(5)}$         | 534 722.8(98038)   | $f_{113}^{(3)}$     | -4986.0(52050)     |
| $f_0^{(6)}$         | 225 611.3(47783)   | $f_{1111}^{(1)}$    | -13 209.3(345172)  |
| $f_0^{(7)}$         | 38 693.7(9197)     | $f_{1111}^{(2)}$    | -7961.8(241989)    |
| $f_1^{(1)}$         | 15 965.3(5006)     | $f_{1113}^{(1)}$    | -17 105.4(247970)  |
| $f_1^{(2)}$         | 53 320.7(18452)    | $f_{1113}^{(2)}$    | -9957.4(173649)    |
| $f_1^{(3)}$         | 78 373.8(31615)    | $f_{1133}^{(1)}$    | -16 781.2(323010)  |
| $f_1^{(4)}$         | 49 300.2(23825)    | $f_{1133}^{(2)}$    | -7986.1(226278)    |

<sup>a</sup>Parameters are defined in Eqs. (1)–(4) of Bunker and Jensen.<sup>15</sup>

<sup>b</sup>In  $\text{cm}^{-1}$  except for  $r_{12}^e$  and  $a_1$  which are in  $\text{\AA}$  and  $\text{\AA}^{-1}$ , respectively.

<sup>c</sup>Constrained value.



Table S4: Potential energy parameters for the cation ground  $\tilde{X}^+ {}^2A_1$  and first excited  $\tilde{A}^+ {}^2B_1$  electronic states

| Param. <sup>a</sup>     | Value <sup>b</sup> | Param. <sup>a</sup> | Value <sup>b</sup> |
|-------------------------|--------------------|---------------------|--------------------|
| $r_{12}^{(\text{res})}$ | 1.4692(33)         | $f_{111}^{(1,+)}$   | 3807.2(450440)     |
| $a_1$                   | 1.40 <sup>c</sup>  | $f_{111}^{(2,+)}$   | -552.9(288337)     |
| $f_0^{(0)}$             | -63 606 558.2(603) | $f_{113}^{(1,+)}$   | 877.6(365305)      |
| $f_{11}^{(0)}$          | 37 006.9(26397)    | $f_{113}^{(2,+)}$   | 3292.8(245871)     |
| $f_{13}^{(0)}$          | -1934.2(31345)     | $f_{1111}^{(1,+)}$  | 3147.2(627633)     |
| $f_{111}^{(0)}$         | -2098.9(145003)    | $f_{1113}^{(1,+)}$  | -5087.8(489254)    |
| $f_{113}^{(0)}$         | -2950.8(114029)    | $f_{1133}^{(1,+)}$  | 739.9(654424)      |
| $f_{1111}^{(0)}$        | -2496.7(249324)    | $f_0^{(1,-)}$       | -15 974.6(8491)    |
| $f_{1113}^{(0)}$        | -631.8(194817)     | $f_0^{(2,-)}$       | -17 407.4(48563)   |
| $f_{1133}^{(0)}$        | 3372.1(260489)     | $f_0^{(3,-)}$       | -44 687.9(114072)  |
| $f_0^{(1,+)}$           | 45 936.1(9072)     | $f_0^{(4,-)}$       | -36 360.9(113209)  |
| $f_0^{(2,+)}$           | 94 283.0(36646)    | $f_0^{(5,-)}$       | -11 807.7(39611)   |
| $f_0^{(3,+)}$           | 83 474.0(51757)    | $f_1^{(1,-)}$       | 4474.8(24638)      |
| $f_0^{(4,+)}$           | 31 000.3(23378)    | $f_1^{(2,-)}$       | 2739.2(48851)      |
| $f_1^{(1,+)}$           | 17 188.5(31373)    | $f_1^{(3,-)}$       | 3398.6(28094)      |
| $f_1^{(2,+)}$           | 58 170.0(102786)   | $f_{11}^{(1,-)}$    | -8154.2(62812)     |
| $f_1^{(3,+)}$           | 71 406.8(136858)   | $f_{11}^{(2,-)}$    | -14 052.2(50297)   |
| $f_1^{(4,+)}$           | 27 443.5(61315)    | $f_{13}^{(1,-)}$    | -10 887.1(168553)  |
| $f_{11}^{(1,+)}$        | -4018.6(135577)    | $f_{13}^{(2,-)}$    | -22 489.1(277134)  |
| $f_{11}^{(2,+)}$        | -4077.6(128642)    | $f_{13}^{(3,-)}$    | -17 194.4(148501)  |
| $f_{13}^{(1,+)}$        | -2750.0(181541)    | $f_{111}^{(1,-)}$   | 12 301.2(82624)    |
| $f_{13}^{(2,+)}$        | -6085.8(295486)    | $f_{113}^{(1,-)}$   | 4240.0(239913)     |
| $f_{13}^{(3,+)}$        | -5237.9(163396)    | $f_{113}^{(2,-)}$   | 10 848.0(230242)   |

<sup>a</sup>Parameters are defined in Eqs. (1)–(4) of Gu *et al.*<sup>16</sup>  $\sigma = -/+$  for the ground  $\tilde{X}^+ {}^2A_1$  and first excited  $\tilde{A}^+ {}^2B_1$  electronic states, respectively.

<sup>b</sup>In  $\text{cm}^{-1}$  except for  $r_{12}^{(\text{res})}$  and  $a_1$  which are in Å and Å<sup>-1</sup>, respectively.

<sup>c</sup>Constrained value.

Table S5: Vibrational energies of the ground  $\tilde{X}^1A_1$  electronic state of the neutral calculated in Section 3.2.2 are compared to those from Clark *et al.*<sup>17</sup> Energies are given in  $\text{cm}^{-1}$  with respect to the ground vibrational state. Vibrational states are assigned with the three vibrational quantum numbers  $v_1, v_2, v_3$  in parentheses, where  $v_2$  is the bent molecule quantum number.

| State | Clark <i>et al.</i> <sup>17</sup> | <i>This work</i> | State | Clark <i>et al.</i> <sup>17</sup> | <i>This work</i> |
|-------|-----------------------------------|------------------|-------|-----------------------------------|------------------|
| (010) | 998                               | 998              | (011) | 2975                              | 2978             |
| (020) | 1978                              | 1980             | (110) | 3002                              | 3002             |
| (001) | 1996                              | 1997             | (120) | 3914                              | 3915             |
| (100) | 2009                              | 2009             | (101) | 3913                              | 3923             |
| (030) | 2954                              | 2954             | (200) | 3930                              | 3932             |

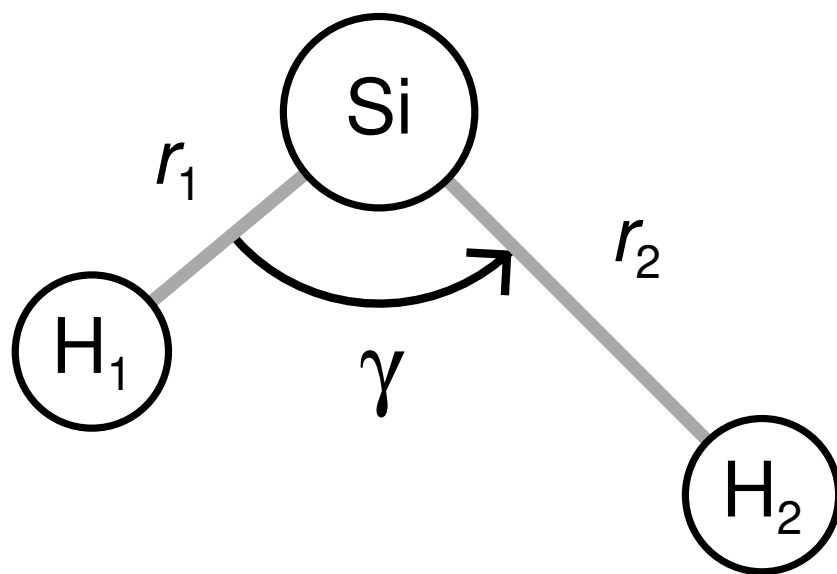

Figure S1: The bond lengths  $r_1$  and  $r_2$  and the bond angle  $\gamma$  are defined.

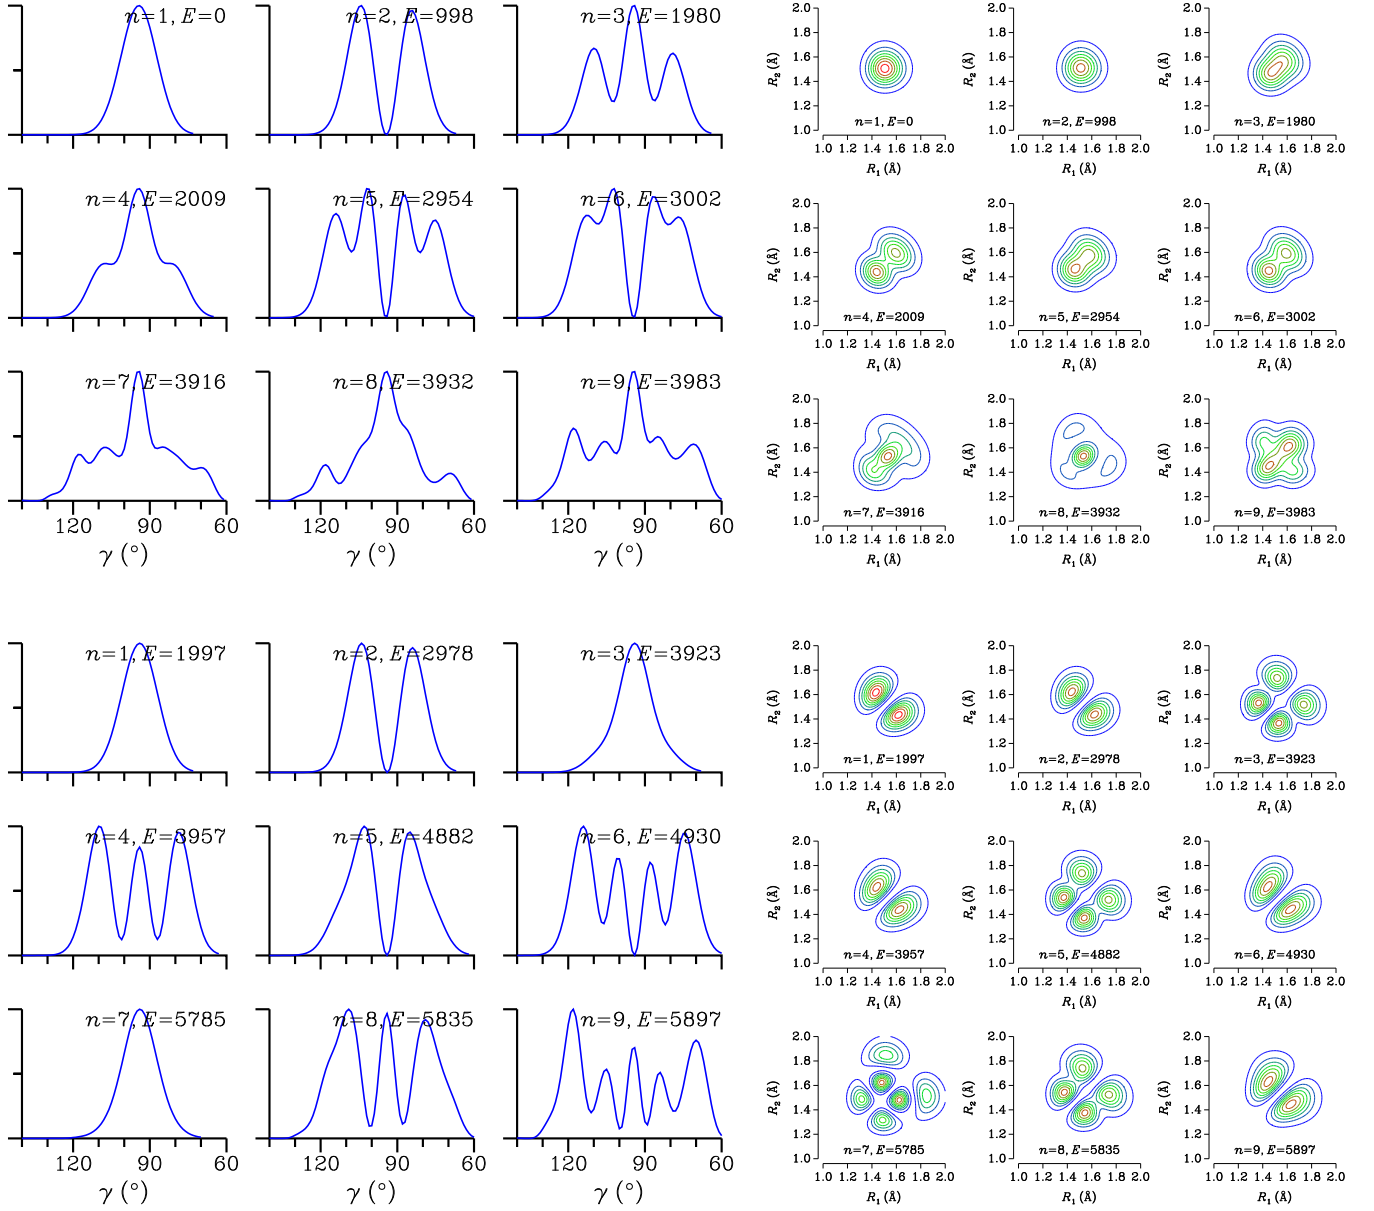

Figure S2: For the 9 lowest symmetrical vibrational states, upper panels, and the 9 lowest anti-symmetrical vibrational states, lower panels, of the ground  $\tilde{X}^1A_1$  electronic state of the neutral, the variations of the bending, left panels, and stretching, right panels, probability densities, as defined in Eqs. (7) of the paper, are shown.  $p_b(\tilde{\gamma})$  is plotted as a function of the Radau bending angle  $\tilde{\gamma}$  in degrees. Contour plots of  $p_s(R_1, R_2)$  are drawn with respect to the Radau stretching coordinates  $R_1$  and  $R_2$  in Å. Each vibrational state is identified by a counter  $n$  and its vibrational energy in  $\text{cm}^{-1}$ .

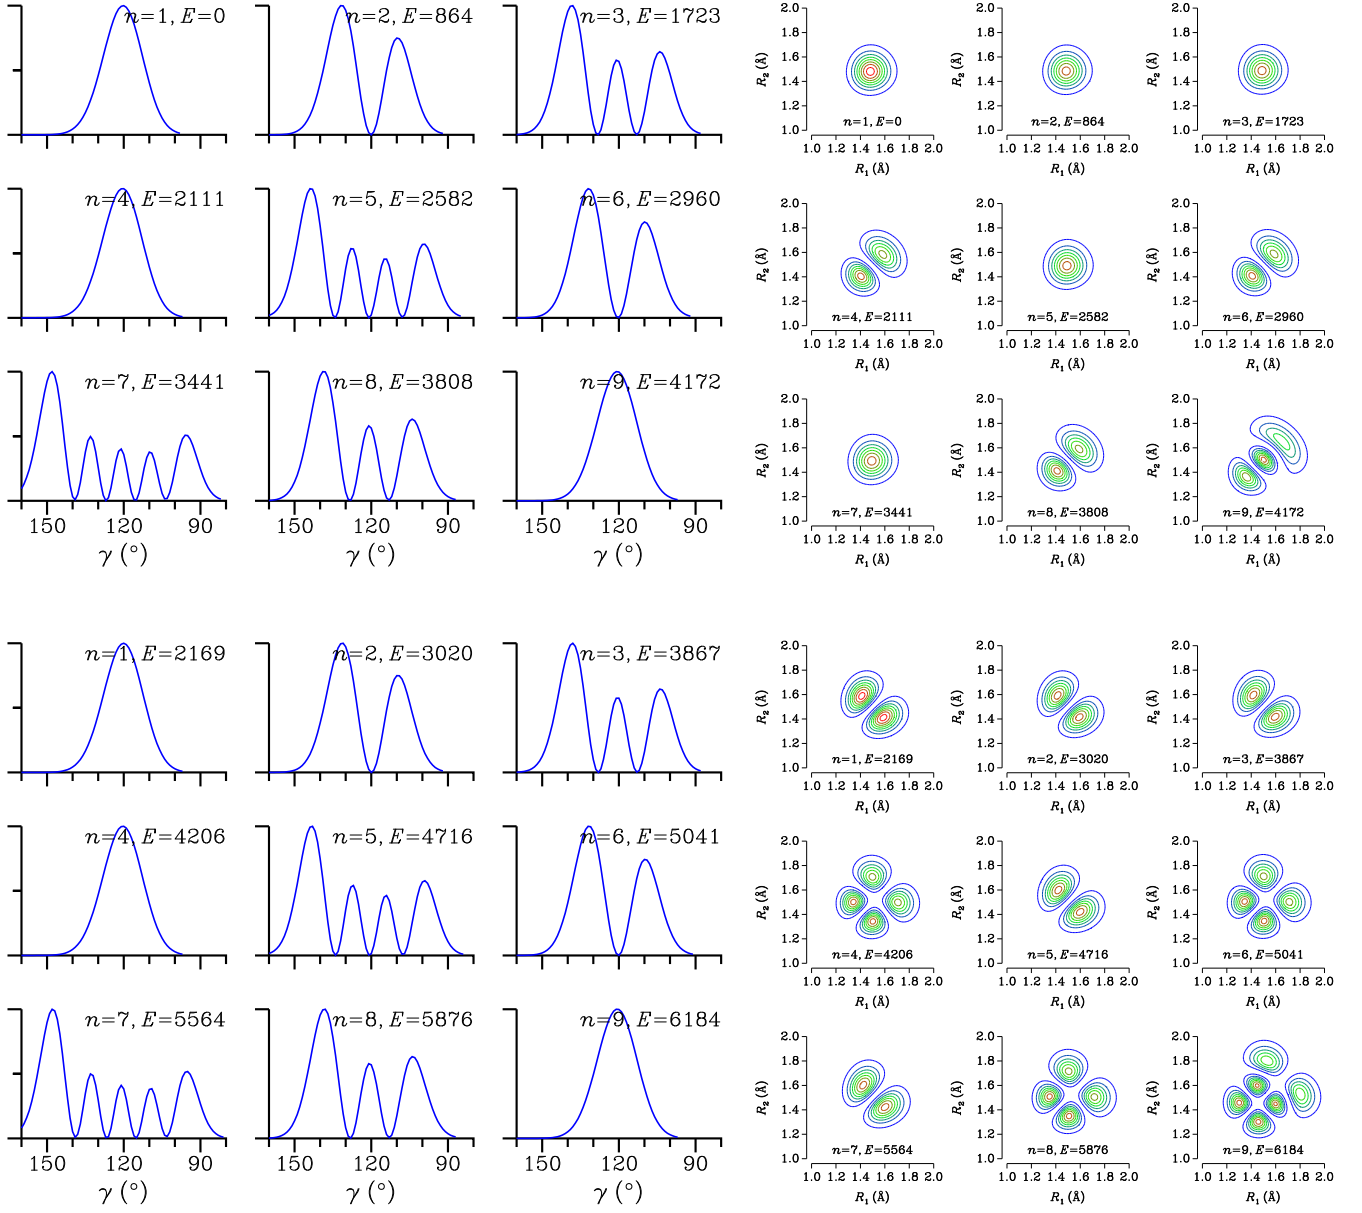

Figure S3: For the 9 lowest symmetrical vibrational states, upper panels, and the 9 lowest anti-symmetrical vibrational states, lower panels, of the triplet  $\tilde{a}^3B_1$  electronic state of the neutral, the variations of the bending, left panels, and stretching, right panels, probability densities, as defined in Eqs. (7) of the paper, are shown.  $p_b(\tilde{\gamma})$  is plotted as a function of the Radau bending angle  $\tilde{\gamma}$  in degrees. Contour plots of  $p_s(R_1, R_2)$  are drawn with respect to the Radau stretching coordinates  $R_1$  and  $R_2$  in Å. Each vibrational state is identified by a counter  $n$  and its vibrational energy in  $\text{cm}^{-1}$ .

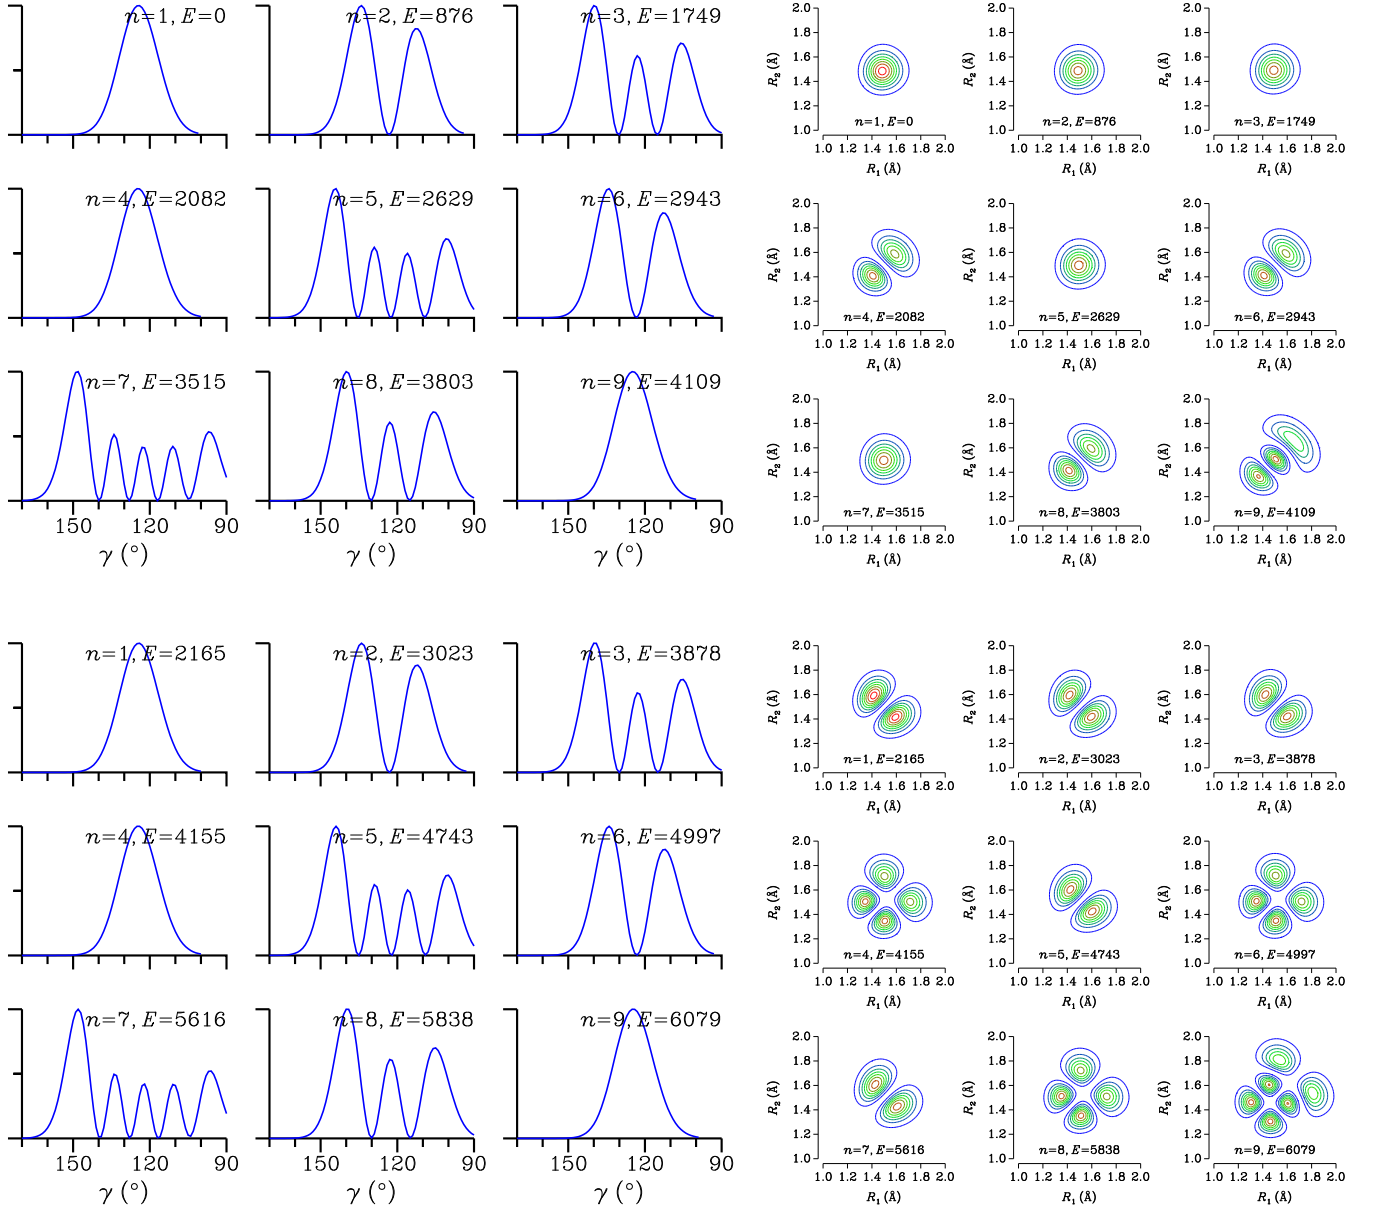

Figure S4: For the 9 lowest symmetrical vibrational states, upper panels, and the 9 lowest antisymmetrical vibrational states, lower panels, of the ground  $\tilde{X}^+ {}^2A_1$  electronic state of the cation, the variations of the bending, left panels, and stretching, right panels, probability densities, as defined in Eqs. (7) of the paper, are shown.  $p_b(\tilde{\gamma})$  is plotted as a function of the Radau bending angle  $\tilde{\gamma}$  in degrees. Contour plots of  $p_s(R_1, R_2)$  are drawn with respect to the Radau stretching coordinates  $R_1$  and  $R_2$  in Å. Each vibrational state is identified by a counter  $n$  and its vibrational energy in  $\text{cm}^{-1}$ .

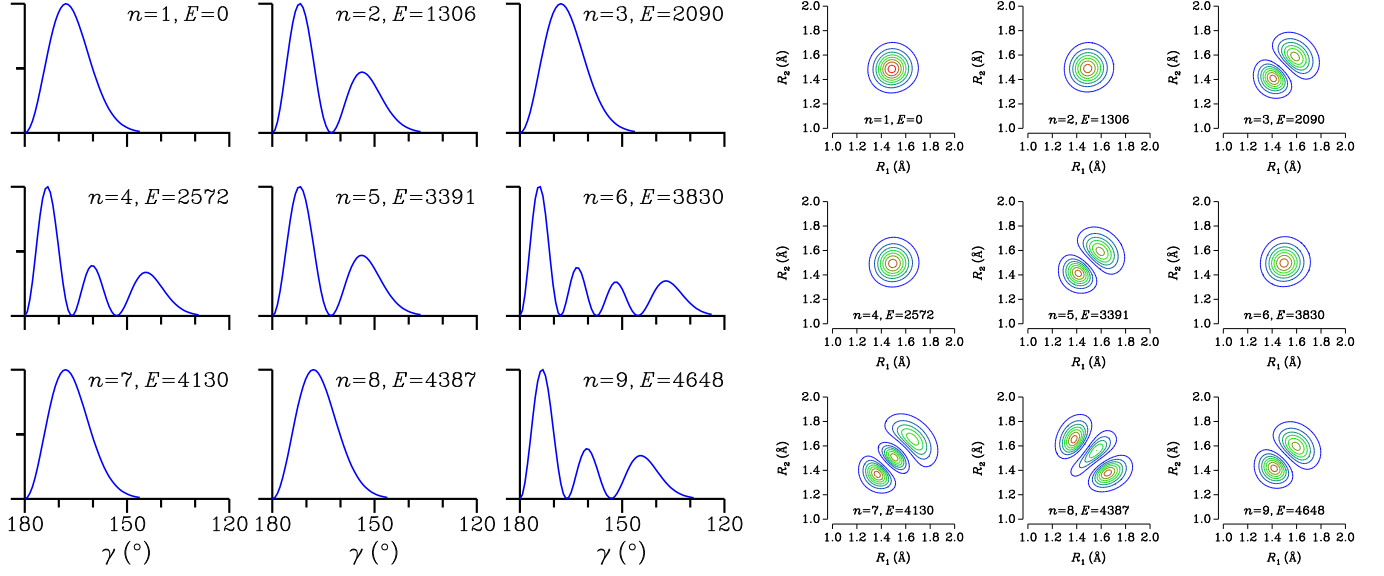

Figure S5: For the 9 lowest symmetrical rovibronic states of the excited  $\tilde{A}^+ {}^2B_1$  electronic state of the cation with  $K = 0$ , the variations of the bending, left panel, and stretching, right panel, probability densities, as defined in Eqs. (7) of the paper, are shown.  $p_b(\tilde{\gamma})$  is plotted as a function of the Radau bending angle  $\tilde{\gamma}$  in degrees. Contour plots of  $p_s(R_1, R_2)$  are drawn with respect to the Radau stretching coordinates  $R_1$  and  $R_2$  in Å. Each vibrational state is identified by a counter  $n$  and its vibrational energy in  $\text{cm}^{-1}$ .

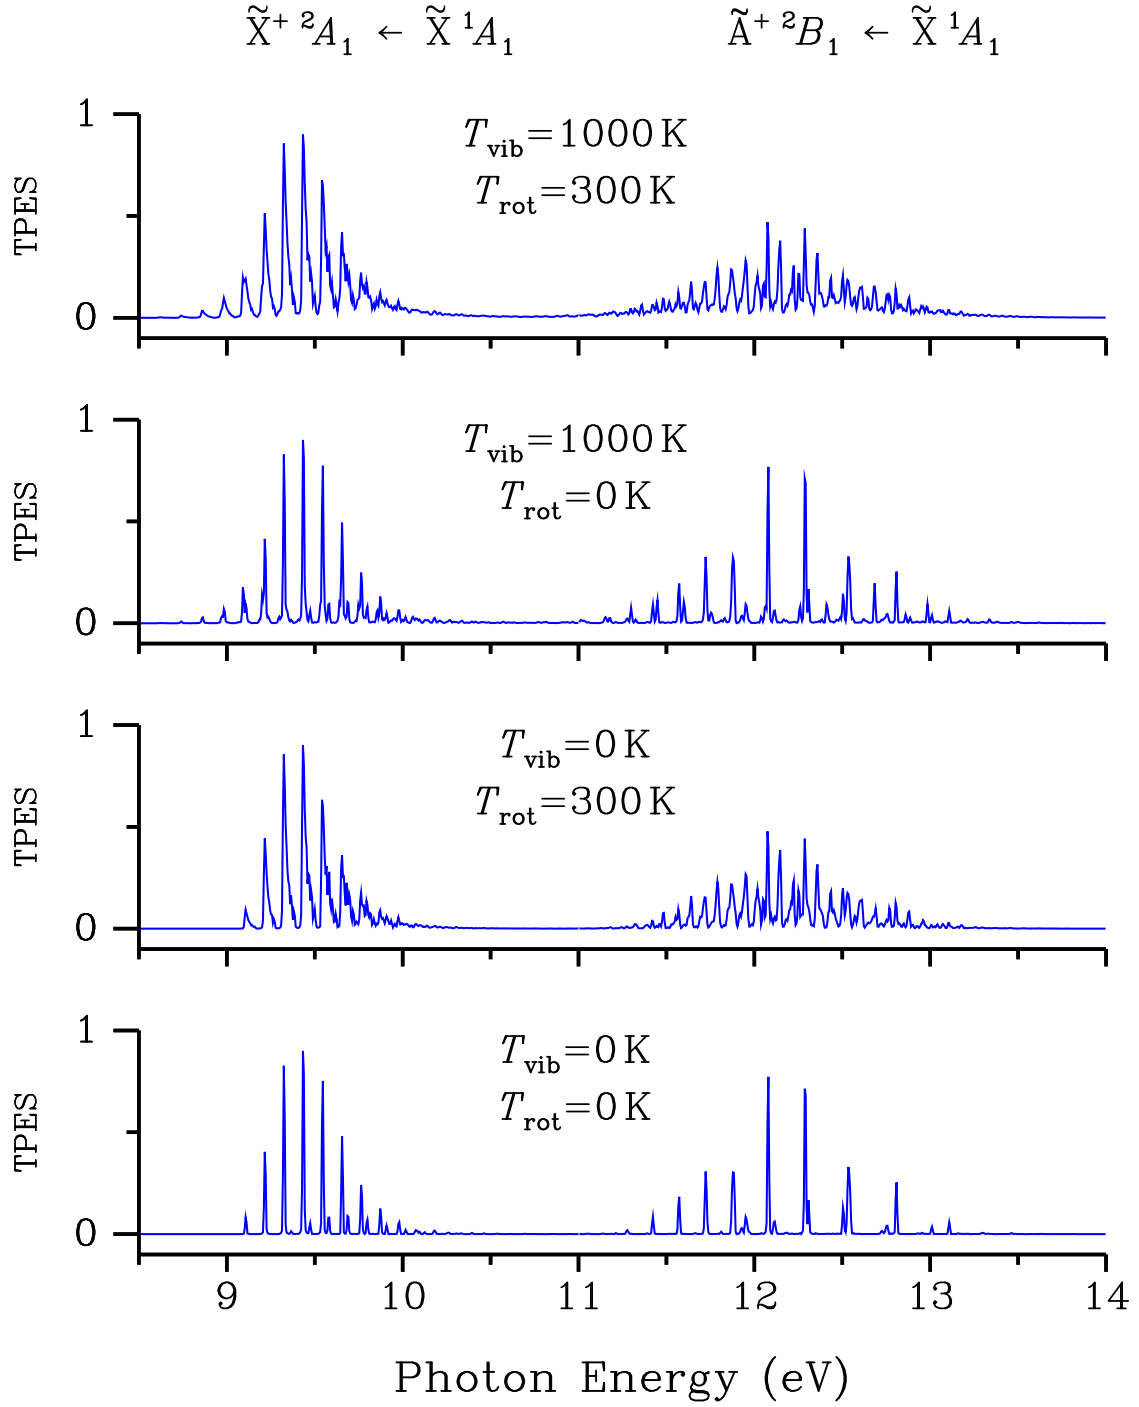

Figure S6: Calculated TPE spectra of the photoionizing transitions originating from the ground  $\tilde{X}^1A_1$  electronic state of the neutral are plotted as functions of the photon energy in eV. The selection rule  $K^+ = K'' \pm 1$  was adopted. Each panel is characterized by a rotational temperature  $T_{\text{rot}}$  and a vibrational temperature  $T_{\text{vib}}$  given in Kelvin. The intensity scale of the two transitions differs.



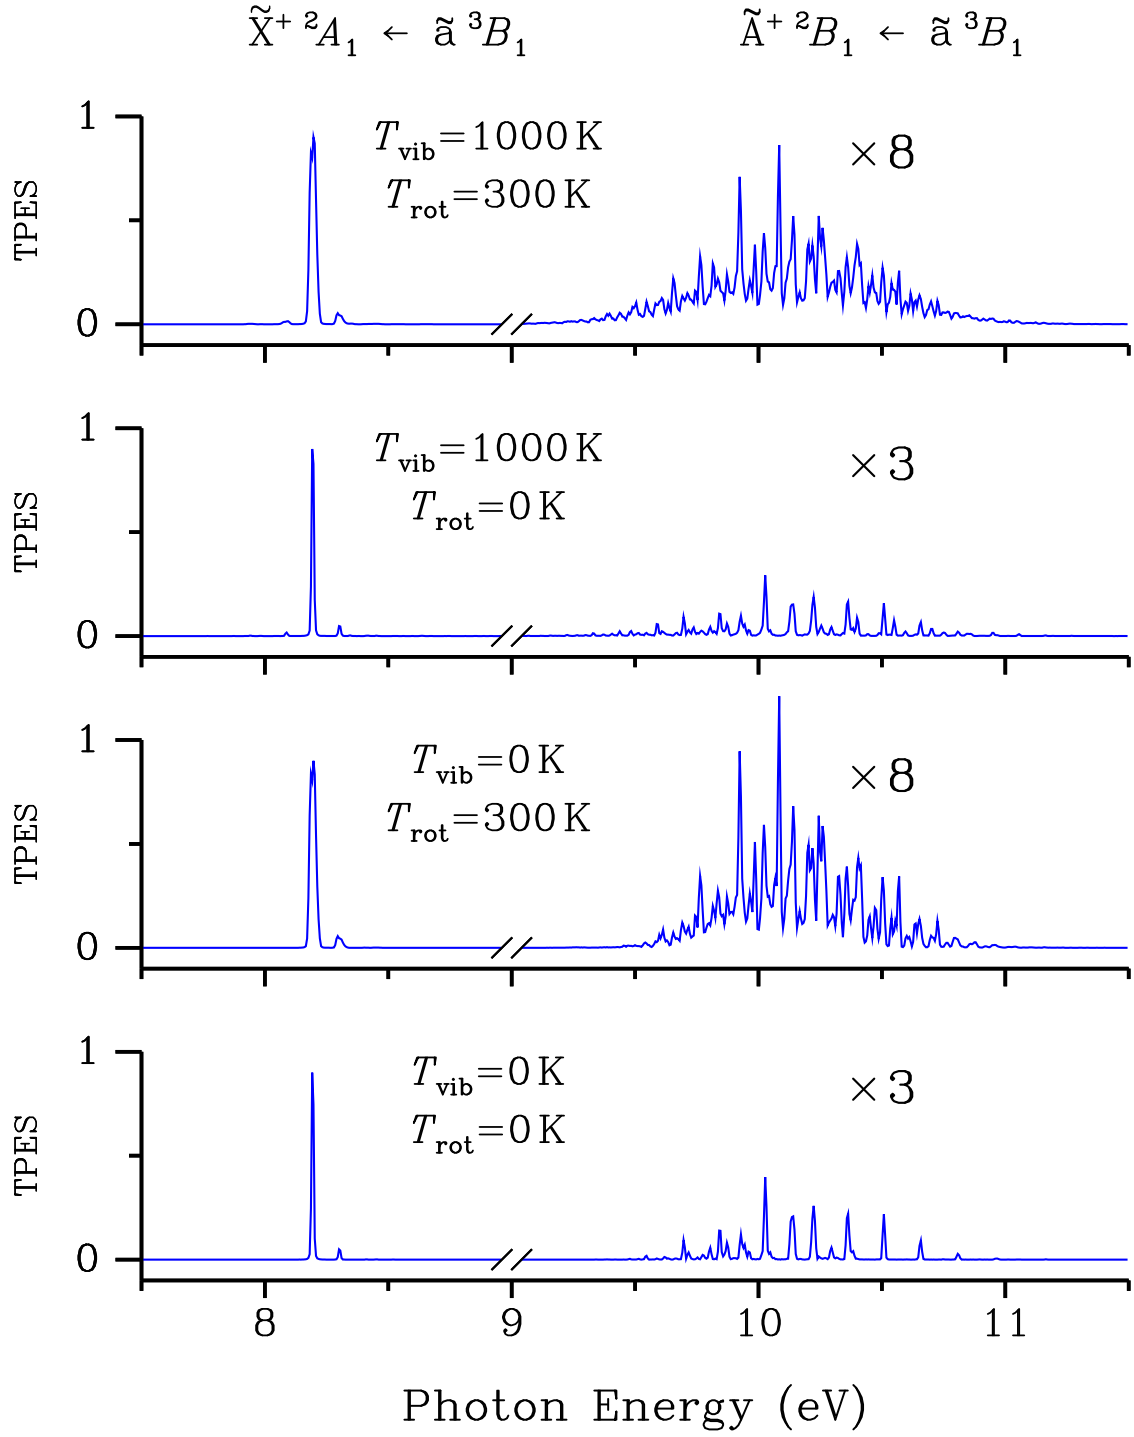

Figure S7: Calculated TPE spectra of the photoionizing transitions originating from the triplet  $\tilde{a} {}^3B_1$  electronic state of the neutral are plotted as functions of the photon energy in eV. The selection rule  $K^+ = K'' \pm 1$  was adopted. Each panel is characterized by a rotational temperature  $T_{\text{rot}}$  and a vibrational temperature  $T_{\text{vib}}$  given in Kelvin. The intensity scale of the two transitions differs.
